# Supplementary material
Source: publisher figshare collection journal article supplement (https://tandf.figshare.com/ndownloader/files/18724904)
Supplement: Supplementary file 1 [file 18724904]

**Supplementary Material**

**S.1. Algorithm for the calibration of the adjusted t-based method**

The calibration is to find as an adjustment to . The bootstrap for the lower confidence bound of can be obtained by the following algorithm.

1. For a given data set, calculate statistics (, , …, ).
2. Simulate parametric bootstrap samples according to the fitted normal distribution and chi-squared distributions.
3. For a required confidence level *,* initialize a pair of values (*,* ) such that it contains 0.5. We start with and .
4. Compute the corresponding empirical coverage probabilities and for the given and , respectively, using the bootstrap samples generated in Step 2 by Equation (6).
5. Reset the values of and and recalculate the corresponding empirical coverage probability by Step 4 until (a prespeciﬁed precision) or (a prespeciﬁed value). If the above criterion is not satisfied, we let . Then, replace with and keep as the current value if . Otherwise, keep as the current value and replace with .
6. Determine

.

**S.2. R code for computing the point estimate and the lower confidence bound for (Use the data set at 5:00 am in March as an illustration)**

B=5000

alpha=0.1

L=17.45

t=3

s=5

muhat=15.76

n=matrix(c(31,31,31,30,30,31,31,31,31,31,31,31,31,31,31),t,s)

KHbar=(t*s)/sum(1/n)

S2=c(156.2097,177.6743,15.1103,17.5411)

df=c(t-1,s-1,(t-1)*(s-1),sum(n)-t*s)

h=c(1/(s*KHbar),1/(t*KHbar),(1-1/s-1/t)/KHbar,(KHbar-1)/KHbar)

c=c(1/(t*s*KHbar),1/(t*s*KHbar),-1/(t*s*KHbar),0)

tauhat2=sum(h*S2)

### the estimate for pi ###

pihat=1-pnorm((L-muhat)/sqrt(tauhat2))

### the lower confidence limit for pi ###

sigmahat2=sum(c*S2)

sigmahat2=ifelse(sigmahat2>0,sigmahat2,0)

V=(sum(c*S2)^2)/sum((c*S2)^2/df)

K=(sum(h*S2)^2)/sum((h*S2)^2/df)

tauhat0.5=K*tauhat2/qchisq(0.5,K)

st=ifelse(sigmahat2>0,sqrt(sigmahat2)*qt(1-alpha,V),0)

#######################################

# t-based method #

######################################

if(pihat<0.2) LB=1-pnorm((L-muhat+st)/sqrt(tauhat0.5))

#########################################

# adjusted-t based method #

########################################

if(pihat>=0.2){

### Step1 ###

sigmahat2_T=(S2[1]-S2[3])/(s*KHbar)

sigmahat2_S=(S2[2]-S2[3])/(t*KHbar)

sigmahat2_TS=(S2[3]-S2[4])/KHbar

sigmahat2_E=S2[4]

yij_b=matrix(,t,s)

### Step2 ###

muhat_b=array(,B)

S2_b=matrix(,4,B)

for(Nl in 1:B){

for(i in 1:t)

for(j in 1:s)

yij_b[i,j]=rnorm(1,muhat,sqrt(max(0,sigmahat2_T+sigmahat2_S+sigmahat2_TS+sigmahat2_E/n[i,j])))

yi_b=array(,t)

for(i in 1:t)yi_b[i]=mean(yij_b[i,])

yj_b=array(,s)

for(j in 1:s)yj_b[j]=mean(yij_b[,j])

muhat_b[Nl]=mean(yi_b)

S2_b[1,Nl]=s*KHbar*sum((yi_b-muhat_b[Nl])^2)/df[1]

S2_b[2,Nl]=t*KHbar*sum((yj_b-muhat_b[Nl])^2)/df[2]

S2_b[3,Nl]=0

for(i in 1:t)for(j in 1:s)S2_b[3,Nl]=S2_b[3,Nl]+(yij_b[i,j]-yi_b[i]-yj_b[j]+muhat_b[Nl])^2

S2_b[3,Nl]=KHbar*S2_b[3,Nl]/df[3]

}

S2_b[4,]=rchisq(B,df[4])*S2[4]/df[4]

### Step3 ###

lamL=0.999

lamU=0.001

### Step4 ###

tauhat2_b=array(,B)

sigmahat2_b=array(,B)

K_b=array(,B)

V_b=array(,B)

taulamU=array(,B)

taulamL=array(,B)

bst=array(,B)

for(i in 1:B){

tauhat2_b[i]=sum(h*S2_b[,i])

sigmahat2_b[i]=sum(c*S2_b[,i])

sigmahat2_b[i]=ifelse(sigmahat2_b[i]>0,sigmahat2_b[i],0)

K_b[i]=(sum(h*S2_b[,i])^2)/sum((h*S2_b[,i])^2/df)

V_b[i]=(sum(c*S2_b[,i])^2)/sum((c*S2_b[,i])^2/df)

taulamU[i]=K_b[i]*tauhat2_b[i]/qchisq(lamU,K_b[i])

taulamL[i]=K_b[i]*tauhat2_b[i]/qchisq(lamL,K_b[i])

bst[i]=ifelse(sigmahat2_b[i]>0,sqrt(sigmahat2_b[i])*qt(1-alpha,V_b[i]),0)

}

pihat_b=1-pnorm((L-muhat)/sqrt(tauhat2))

LBlamU=1-pnorm((L-muhat_b+bst)/sqrt(taulamU))

LBlamL=1-pnorm((L-muhat_b+bst)/sqrt(taulamL))

CP_lamU=sum(LBlamU<=pihat_b)/B

CP_lamL=sum(LBlamL<=pihat_b)/B

### Step5 ###

while(CP_lamU - CP_lamL >0.05 & abs(lamU-lamL)>0.01){

lamM=(lamU+lamL)/2

tauM=K_b*tauhat2_b/qchisq(lamM,K_b)

pilamM=1-pnorm(((L-muhat_b)+bst)/sqrt(tauM))

CP_lamM= sum(pilamM<=pihat_b)/B

lamU=ifelse(CP_lamM >=1-alpha,lamM,lamU)

lamL=ifelse(CP_lamM >=1-alpha,lamL,lamM)

CP_lamU =ifelse(CP_lamM >=1-alpha, CP_lamM, CP_lamU)

CP_lamL =ifelse(CP_lamM >=1-alpha, CP_lamL, CP_lamM)

}

### Step6 ###

lamadj=lamL+(lamU-lamL)*(1-alpha- CP_lamL)/( CP_lamU - CP_lamL)

lamadj=ifelse(lamadj<0,0,lamadj)

lamadj=ifelse(lamadj>1,1,lamadj)

#####################################################################

tauhatadj=K*tauhat2/qchisq(lamadj,K)

LB=1-pnorm((L-muhat+st)/sqrt(tauhatadj))

if(is.na(LB)==T)LB=1-pnorm((L-muhat+st)/sqrt(tauhat0.5))

}

pihat

LB
